# Supplementary material for: Who’s holding the baby? A prospective diary study of the contact patterns of mothers with an infant
Source: BMC Infect Dis. 2017 Sep 20;17:634. doi: 10.1186/s12879-017-2735-8 (PMC5607568; doi:10.1186/s12879-017-2735-8)
Supplement: Supplementary file 6 — Mean daily number of non-companion contacts. Provides data from our study underlying Supplementary Figure 1. (XLSX 11 kb) [file 12879_2017_2735_MOESM6_ESM.xlsx]

## Sheet: age_dist_non_companion
age	group	mean_contacts
0-4	Boroondara	0.25
5-9	Boroondara	0.102041
10-14	Boroondara	0.00510204
15-19	Boroondara	0.0663265
20-24	Boroondara	0.387755
25-29	Boroondara	0.260204
30-34	Boroondara	0.346939
35-39	Boroondara	0.397959
40-44	Boroondara	0.362245
45-49	Boroondara	0.0867347
50-54	Boroondara	0.142857
55-59	Boroondara	0.0408163
60-64	Boroondara	0.117347
65-69	Boroondara	0.0153061
70+	Boroondara	0.0510204
0-4	Hume (English)	0.188119
5-9	Hume (English)	0.0594059
10-14	Hume (English)	0.0049505
15-19	Hume (English)	0.0940594
20-24	Hume (English)	0.212871
25-29	Hume (English)	0.188119
30-34	Hume (English)	0.287129
35-39	Hume (English)	0.193069
40-44	Hume (English)	0.193069
45-49	Hume (English)	0.0990099
50-54	Hume (English)	0.108911
55-59	Hume (English)	0.019802
60-64	Hume (English)	0.0940594
65-69	Hume (English)	0.0346535
70+	Hume (English)	0.029703
